# Supplementary material for: Environmental factors regulate Paneth cell phenotype and host susceptibility to intestinal inflammation in Irgm1-deficient mice
Source: PubMed Central journal article supplement (PMC5894938; doi:10.1242/dmm.031070), 2018-02-01
Supplement: dmm-11-031070-s1.pdf [file dmm-11-031070-s1.pdf]

## SUPPLEMENTAL MATERIAL

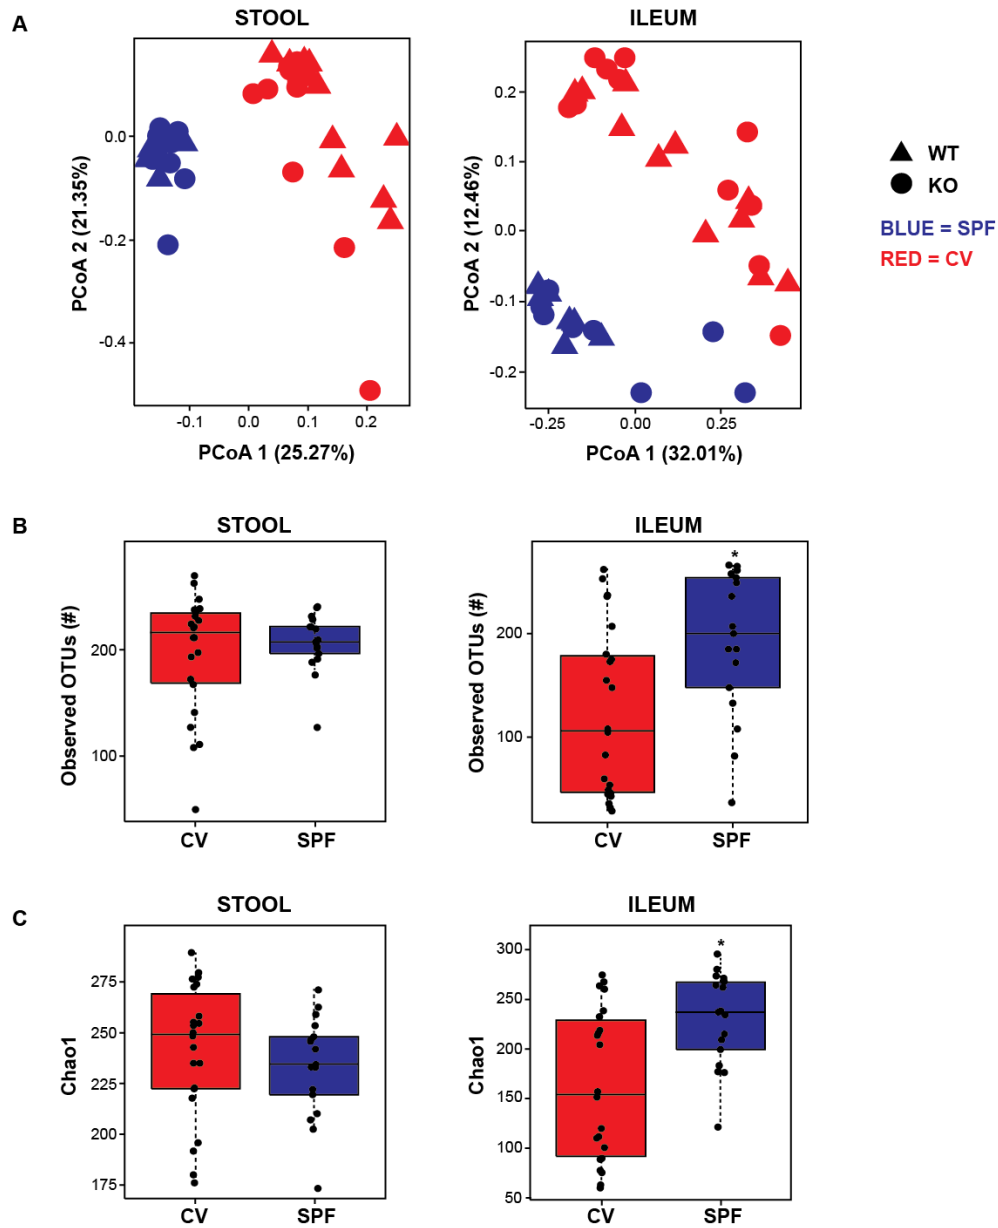

**Fig. S1.** QIIME analysis confirms gut microbial composition and diversity differ between housing conditions, but not genotype. A: Principal coordinates analysis of stool and ileal microbial composition of WT and *Irgm1* KO mice in conventional (CV) and specific pathogen free (SPF) conditions based on QIIME UniFrac distances. Stool CV versus SPF, FDR <  $6.4 \times 10^{-10}$ ; ileum CV versus SPF, FDR < 0.007. For WT versus KO mice in both tissue compartments, FDR > 0.09. B: Observed OTUs calculated from QIIME close reference

pipeline. C: Chao1  $\alpha$ -diversity index calculated from QIIME close reference pipeline. N = 11 CV WT, 11 CV KO, 7 SPF WT, 10 SPF KO. \*FDR = 0.021.

## Supplemental Tables

| Genus             | Compartment | P-value     | FDR         |
|-------------------|-------------|-------------|-------------|
| Akkermansia       | Stool       | 2.3617E-06  | 8.26593E-05 |
| Bifidobacterium   | Stool       | 7.89538E-06 | 0.000138169 |
| Butyricimonas     | Stool       | 0.000466406 | 0.004081048 |
| Dorea             | Stool       | 0.000461691 | 0.004081048 |
| Anaeroplasma      | Stool       | 0.001140313 | 0.007982192 |
| Vagococcus        | Ileum       | 1.38967E-12 | 7.22626E-11 |
| Chelonobacter     | Ileum       | 8.79941E-12 | 2.28785E-10 |
| Erysipelothrix    | Ileum       | 2.20262E-11 | 3.81787E-10 |
| Pseudochrobactrum | Ileum       | 8.97944E-11 | 1.16733E-09 |
| Marinomonas       | Ileum       | 3.59938E-10 | 3.74336E-09 |
| Halomonas         | Ileum       | 5.11173E-10 | 4.43016E-09 |
| Proteiniclasticum | Ileum       | 8.98642E-10 | 6.67563E-09 |
| Leucobacter       | Ileum       | 5.99842E-09 | 3.89897E-08 |
| Agrococcus        | Ileum       | 7.33039E-09 | 4.23534E-08 |
| Dysgonomonas      | Ileum       | 8.6816E-09  | 4.51443E-08 |
| Psychrobacter     | Ileum       | 2.63154E-07 | 1.244E-06   |
| Rhodococcus       | Ileum       | 7.73384E-07 | 3.35133E-06 |
| Shewanella        | Ileum       | 1.07208E-06 | 4.28834E-06 |
| Aquimarina        | Ileum       | 2.24452E-06 | 8.33678E-06 |
| Bifidobacterium   | Ileum       | 1.22284E-05 | 4.23919E-05 |
| Anaeroplasma      | Ileum       | 1.34341E-05 | 4.36609E-05 |
| Chryseobacterium  | Ileum       | 2.31769E-05 | 7.08939E-05 |
| Dorea             | Ileum       | 2.89641E-05 | 8.3674E-05  |
| Akkermansia       | Ileum       | 0.000197202 | 0.000539711 |
| Microbacterium    | Ileum       | 0.000295184 | 0.000767478 |
| Coprobacillus     | Ileum       | 0.000337282 | 0.000835173 |
| Blautia           | Ileum       | 0.000587913 | 0.001329194 |
| Clostridium       | Ileum       | 0.000568876 | 0.001329194 |
| Trichococcus      | Ileum       | 0.001315745 | 0.002850781 |

|                |       |             |             |
|----------------|-------|-------------|-------------|
| Butyricimonas  | Ileum | 0.001819406 | 0.003784364 |
| Vibrio         | Ileum | 0.002193962 | 0.004387924 |
| Helicobacter   | Ileum | 0.004657984 | 0.008970933 |
| Enterococcus   | Ileum | 0.007563428 | 0.014046366 |
| Adlercreutzia  | Ileum | 0.013553457 | 0.02430275  |
| Oscillospira   | Ileum | 0.016514794 | 0.028625644 |
| Desulfovibrio  | Ileum | 0.022523324 | 0.036600401 |
| Staphylococcus | Ileum | 0.022233868 | 0.036600401 |
| AF12           | Ileum | 0.028106572 | 0.044289144 |
| Pseudomonas    | Ileum | 0.030143274 | 0.046101478 |
| Flavobacterium | Ileum | 0.03219191  | 0.047827981 |
| Acinetobacter  | Ileum | 0.033112258 | 0.047828818 |

**Table S1.** *Bacterial taxa differentially abundant in conventional (CV) versus specific pathogen free (SPF) facilities.* Genus-level bacterial taxa that are significantly different in CV versus SPF facilities are shown. *P*-values are reported from the mixed linear model using *F*-test, which accounts for the contribution of cage. We controlled for false discovery rate (FDR) by correcting the *P*-values using Benjamini and Hochberg (BH) approach.

|                | <b>CV</b>                                      | <b>SPF</b>                    | <b>GF</b>                                                       |
|----------------|------------------------------------------------|-------------------------------|-----------------------------------------------------------------|
| <b>Feed</b>    | Purina 5001                                    | Purina 5053<br>(irradiated)   | Teklad Global<br>2020SX<br>(autoclaved)                         |
| <b>Water</b>   | Triple filtered                                | Reverse osmosis               | Autoclaved                                                      |
| <b>Bedding</b> | ALPHA-dri/Cob<br>blend                         | Corncob<br>(autoclaved)       | Teklad 7070C<br>Diamond Dry<br>Cellulose<br>(autoclaved)        |
| <b>Caging</b>  | Individual<br>ventilated cages<br>(hot-washed) | Shoebox cages<br>(autoclaved) | Shoebox cages<br>(autoclaved) within<br>flexible film isolators |

**Table S2.** *Husbandry details for individual mouse facilities.* Specific food, water, bedding, enrichment, and caging sources are indicated for conventional (CV), specific pathogen free (SPF), and germ-free (GF) housing facilities. Sterilization techniques are also shown when utilized.

|                         |                                        | Conventional<br>(CV) | Specific Pathogen Free<br>(SPF) |
|-------------------------|----------------------------------------|----------------------|---------------------------------|
| <b>Viral Agents</b>     | Parvoviruses (MPV-1 & 2, Minute virus) | -                    | -                               |
|                         | Sendai virus                           | -                    | -                               |
|                         | Pneumonia virus of mice                | -                    | -                               |
|                         | Mouse hepatitis virus                  | -                    | -                               |
|                         | Mouse norovirus                        | +                    | -                               |
|                         | Reovirus                               | -                    | -                               |
|                         | Enzootic diarrhea of mice              | -                    | -                               |
|                         | Theiler's murine encephalomyelitis     | -                    | -                               |
| <b>Bacterial Agents</b> | <i>Mycoplasma pulmonis</i>             | -                    | -                               |
|                         | <i>Helicobacter</i> spp.               | +                    | -                               |
|                         | <i>Pasturella pneumotropica</i>        | Not tested           | -                               |

**Table S3.** Colony health surveillance results from conventional (CV) and specific pathogen free (SPF) facilities. Results of dirty bedding sentinel testing of either exposure (serology) or presence (PCR) of murine pathogens in the CV and SPF colonies during the time course of the study.

|       |                                                                   |     |
|-------|-------------------------------------------------------------------|-----|
| V6F1  | 5'- ACACTCTTTCCCTACACGACGCTCTTCCGATCTATAGCGCAACGCGARGAACCTTACC    | -3' |
| V6F2  | 5'- ACACTCTTTCCCTACACGACGCTCTTCCGATCTAGGGTCAACGCGARGAACCTTACC     | -3' |
| V6F3  | 5'- ACACTCTTTCCCTACACGACGCTCTTCCGATCTTTCATCAACGCGARGAACCTTACC     | -3' |
| V6F4  | 5'- ACACTCTTTCCCTACACGACGCTCTTCCGATCTGATCGTCAACGCGARGAACCTTACC    | -3' |
| V6F5  | 5'- ACACTCTTTCCCTACACGACGCTCTTCCGATCTGCCCGTCAACGCGARGAACCTTACC    | -3' |
| V6F6  | 5'- ACACTCTTTCCCTACACGACGCTCTTCCGATCTCTGTCCAACGCGARGAACCTTACC     | -3' |
| V6F7  | 5'- ACACTCTTTCCCTACACGACGCTCTTCCGATCTCACGTCAACGCGARGAACCTTACC     | -3' |
| V6F8  | 5'- ACACTCTTTCCCTACACGACGCTCTTCCGATCTCGTACGCAACGCGARGAACCTTACC    | -3' |
| V6F9  | 5'- ACACTCTTTCCCTACACGACGCTCTTCCGATCTGGACCAACGCGARGAACCTTACC      | -3' |
| V6F10 | 5'- ACACTCTTTCCCTACACGACGCTCTTCCGATCTTAGACAACGCGARGAACCTTACC      | -3' |
| V6F11 | 5'- ACACTCTTTCCCTACACGACGCTCTTCCGATCTTCATCAACGCGARGAACCTTACC      | -3' |
| V6F12 | 5'- ACACTCTTTCCCTACACGACGCTCTTCCGATCTACTTCAACGCGARGAACCTTACC      | -3' |
| V6R1  | 5'- CTCGGCATTCCCTGCTGAACCGCTCTTCCGATCTATAGCGACAACACGAGCTGACGAC    | -3' |
| V6R2  | 5'- CTCGGCATTCCCTGCTGAACCGCTCTTCCGATCTAGGGTACAACACGAGCTGACGAC     | -3' |
| V6R3  | 5'- CTCGGCATTCCCTGCTGAACCGCTCTTCCGATCTTTCATACAACACGAGCTGACGAC     | -3' |
| V6R4  | 5'- CTCGGCATTCCCTGCTGAACCGCTCTTCCGATCTGATCGTACAACACGAGCTGACGAC    | -3' |
| V6R5  | 5'- CTCGGCATTCCCTGCTGAACCGCTCTTCCGATCTGCCCGTACAACACGAGCTGACGAC    | -3' |
| V6R6  | 5'- CTCGGCATTCCCTGCTGAACCGCTCTTCCGATCTCTGTCACAACACGAGCTGACGAC     | -3' |
| V6R7  | 5'- CTCGGCATTCCCTGCTGAACCGCTCTTCCGATCTCACGTACAACACGAGCTGACGAC     | -3' |
| V6R8  | 5'- CTCGGCATTCCCTGCTGAACCGCTCTTCCGATCTCGTACGACAACACGAGCTGACGAC    | -3' |
| V6R9  | 5'- CTCGGCATTCCCTGCTGAACCGCTCTTCCGATCTGGACACAACACGAGCTGACGAC      | -3' |
| V6R10 | 5'- CTCGGCATTCCCTGCTGAACCGCTCTTCCGATCTTAGAACAACACGAGCTGACGAC      | -3' |
| V6R11 | 5'- CTCGGCATTCCCTGCTGAACCGCTCTTCCGATCTTCATACAACACGAGCTGACGAC      | -3' |
| V6R12 | 5'- CTCGGCATTCCCTGCTGAACCGCTCTTCCGATCTACTTACAACACGAGCTGACGAC      | -3' |
| PCRF1 | 5'- AATGATACGGCGACCACCGAGATCTACACTCTTCCCTACACGACGCTCTTCCGATCT     | -3' |
| PCRR1 | 5'- CAAGCAGAAGACGCCATACGAGATCGGTCTCGGCATTCCGTCTGAACCGCTCTTCCGATCT | -3' |

**Table S4.** Primers used to create V6 16S rRNA library for sequencing. V6F1-12 and V6R1-12 were used to initial PCR. PCRF1/PCRR1 were used for second stage PCR.
